# Supplementary material for: Rotavirus spike protein ΔVP8* as a novel carrier protein for conjugate vaccine platform with demonstrated antigenic potential for use as bivalent vaccine
Source: PubMed Central journal article supplement (PMC8586335; doi:10.1038/s41598-021-01549-z), 2021-11-11
Supplement: 41598_2021_1549_MOESM1_ESM.pdf [file 41598_2021_1549_MOESM1_ESM.pdf]

**Rotavirus spike protein  $\Delta$ VP8\* as a novel carrier protein for  
conjugate vaccine platform with demonstrated antigenic potential  
for use as bivalent vaccine**

Wook-Jin Park<sup>1,2</sup>, Yeon-Kyung Yoon<sup>2</sup>, Ji-Sun Park<sup>2</sup>, Ruchirkumar Pansuriya<sup>2</sup>, Yeong-Jae Seok<sup>1</sup>  
and Ravi Ganapathy<sup>2,\*</sup>

<sup>1</sup>School of Biological Sciences and Institute of Microbiology, Seoul National University, Seoul  
08826, Republic of Korea

<sup>2</sup>International Vaccine Institute, Seoul 08826, Republic of Korea

\*Corresponding: [ravi.ganapathy@ivi.int](mailto:ravi.ganapathy@ivi.int)

## Supplementary Figures

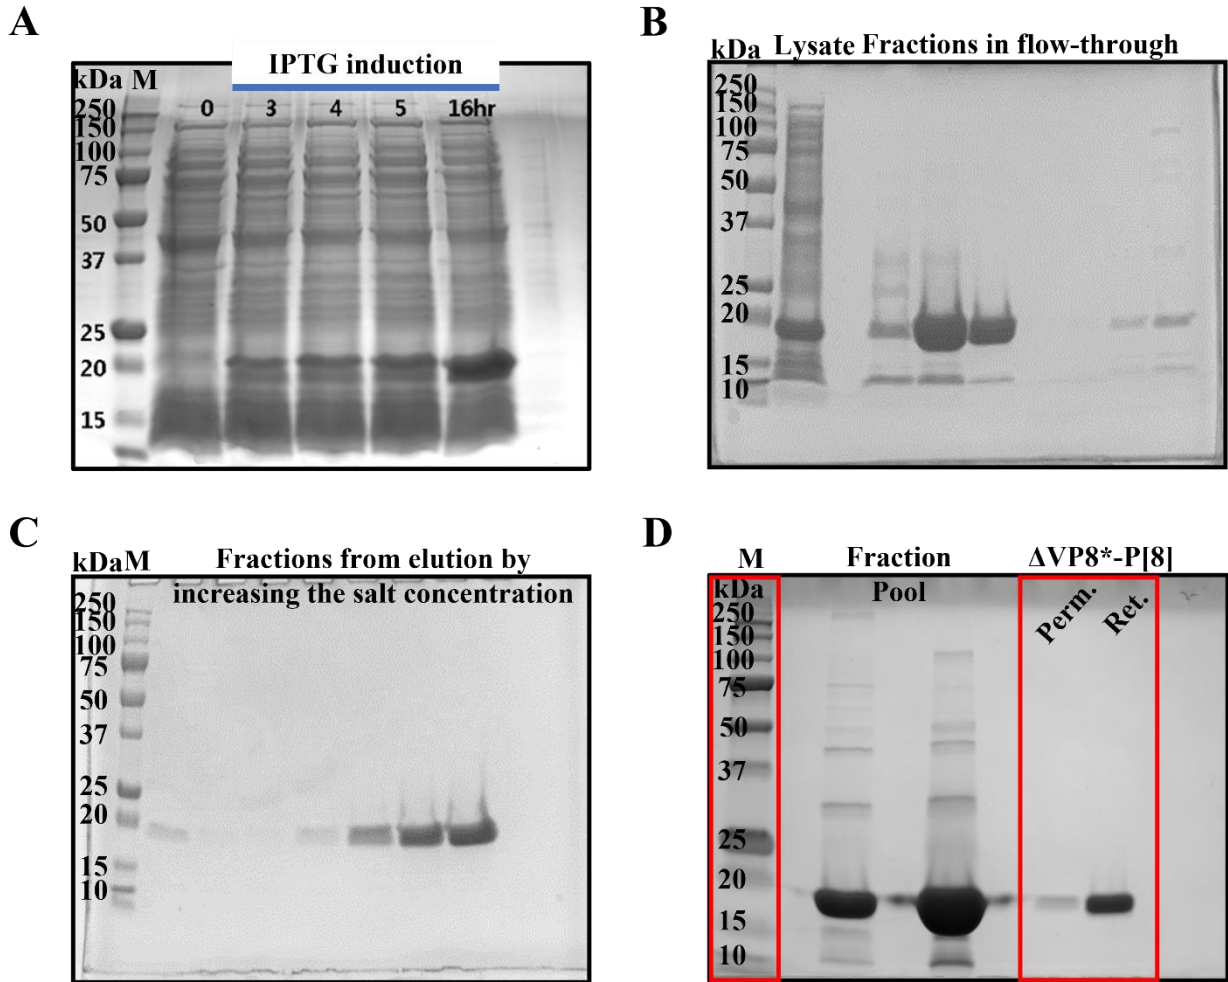

**Supplementary Figure 1.** Expression and purification the recombinant  $\Delta$ VP8\*-P[8] protein. (A) SDS-PAGE profiles of the expression of  $\Delta$ VP8\* upon IPTG induction. SDS-PAGE analysis result of (B) the anion exchange chromatography, (C) the cation exchange chromatography, and (D) concentration and diafiltration using 5kDa cut-off membrane (Ret.: Retentate from 5 kDa TFF, Perm.: Permeate from 5 kDa TFF, and M: Marker). Red boxes indicate the region selected for presentation in Figure 1A. Full-size gels were imaged with the imaging Densitometer (Model GS-800, Bio-Rad). SimplyBlue stained 12% SDS-PAGE.

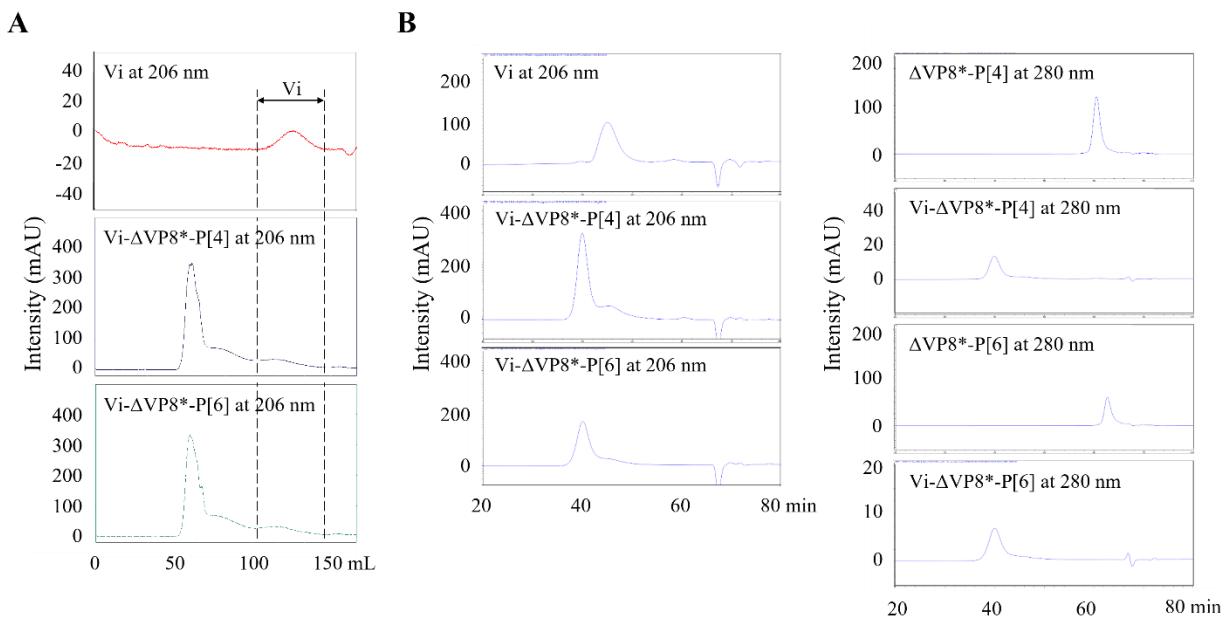

**Supplementary Figure 2.** Physicochemical characteristics of the glycoconjugates. (A) Sephacryl S-1000 profiles of Vi and Vi- $\Delta$ VP8\*-P[4] and P[6]. Vi and Vi- $\Delta$ VP8\* conjugates was dialyzed against PBS and loaded onto Sephacryl S-1000 (1.6cm  $\times$  90cm) eluting with 10mM NaH<sub>2</sub>PO<sub>4</sub>, 5mM NaCl, pH 7.0 at a flow rate of 0.5 mL/min. (B) SEC-HPLC profiles of Vi- $\Delta$ VP8\*-P[4] and P[6]. OHPak SB-804 HQ and OHPak SB-806 HQ columns in series, 0.1M NaCl, 0.1M NaH<sub>2</sub>PO<sub>4</sub>, 5% ACN, pH 7.2; 0.3 mL/min. flow rate.

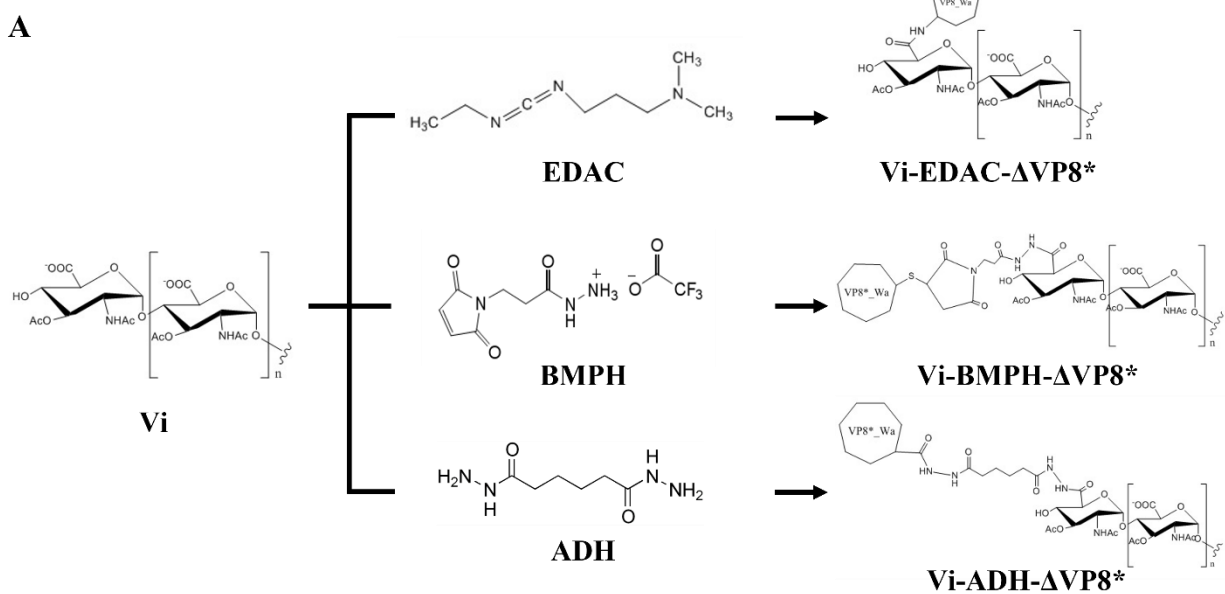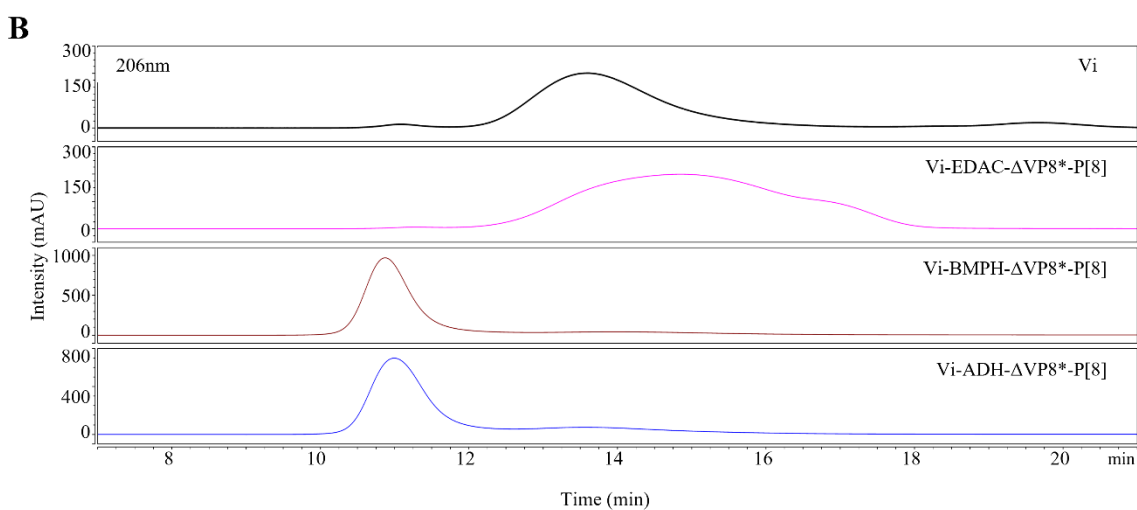

**Supplementary Figure 3.** Conjugation scheme and physicochemical characteristics of Vi- $\Delta$ VP8\* conjugates with different linkers. (A) Conjugation scheme for the synthesis of Vi- $\Delta$ VP8\* conjugates. (B) SEC-HPLC analysis of Vi- $\Delta$ VP8\*-P[8] conjugates

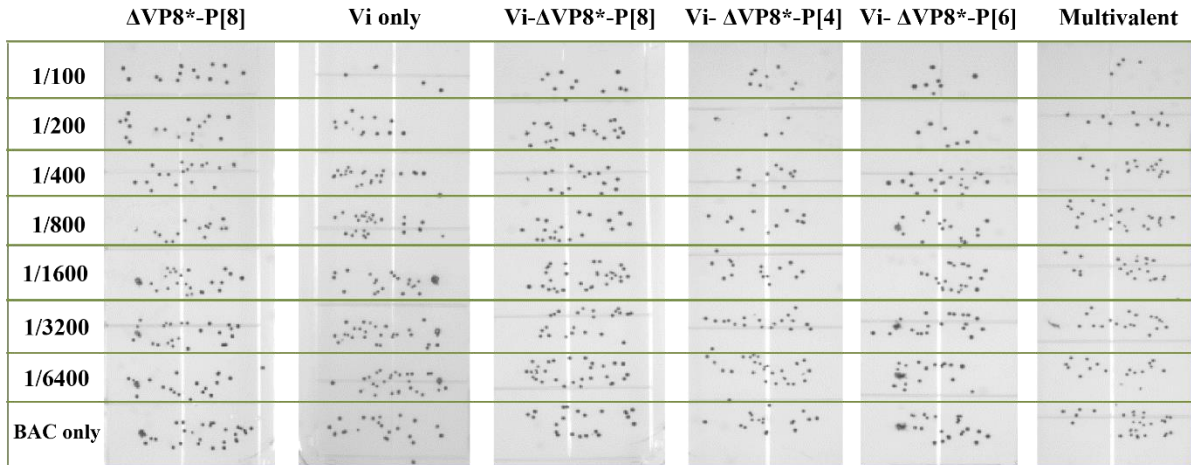

**Supplementary Figure 4.** SBA measures functional *S. Typhi* specific antibodies capable of complement-mediated bacterial killing.

**A**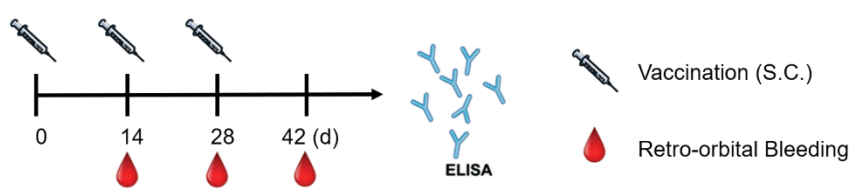**B**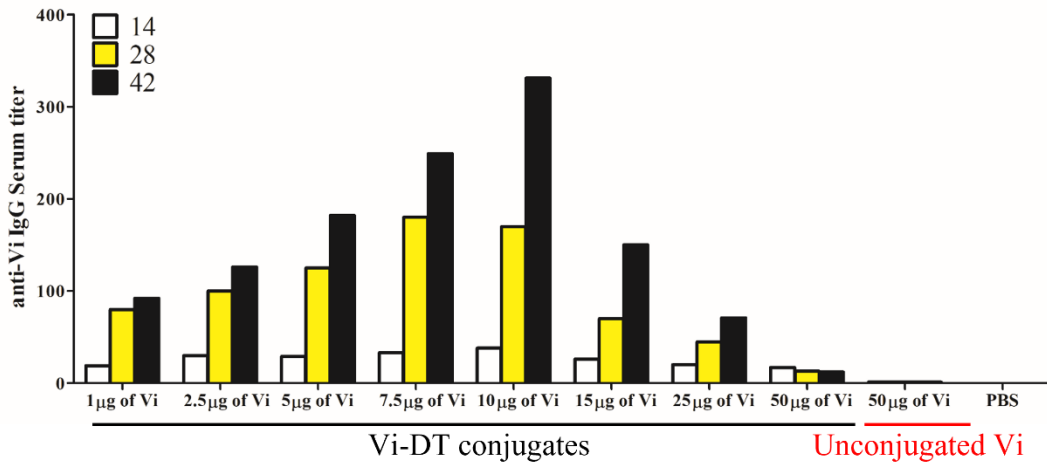

**Supplementary Figure 5.** Influence of Vi amount on the immunogenicity of Vi conjugates in mice.

(A) A schematic diagram for subcutaneous (SC) vaccination and bleeding. (B) Anti-Vi IgG antibody titer. Mice were immunized with three doses of Vi-DT conjugates at 1 µg, 2.5 µg, 5 µg, 7.5 µg, 10 µg, 15 µg, 25 µg, or 50 µg Vi/doses. Mice were injected with 50 µg of Vi. Controls were injected with PBS.

**A**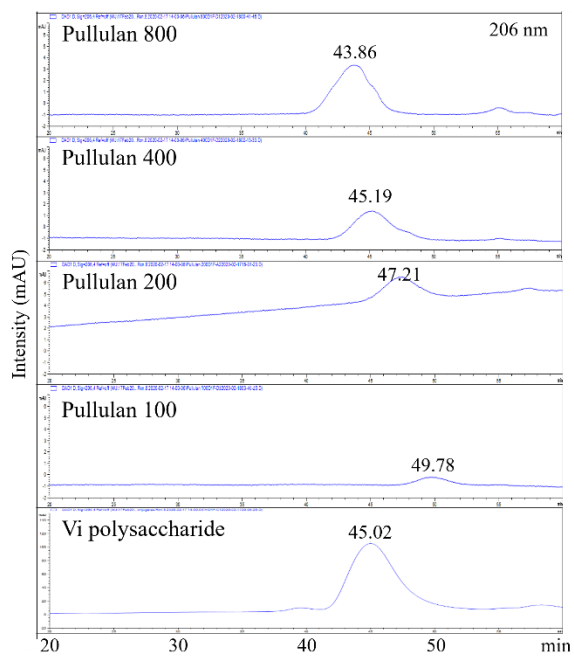**B**

| Standard          | Retention time (Min) | Mw (kDa) |
|-------------------|----------------------|----------|
| Pullulan 800      | 43.86                | 736      |
| Pullulan 400      | 45.19                | 343      |
| Pullulan 200      | 47.21                | 202      |
| Pullulan 100      | 49.78                | 110      |
| Sample            | Retention time (Min) | Mw (kDa) |
| Vi polysaccharide | 45.02                | 440      |

**Supplementary Figure 6.** SEC-HPLC profiles of pullulan standard and Vi. OHpak SB-804 HQ and OHpak SB-806 HQ columns in series, 0.1M NaCl, 0.1M NaH<sub>2</sub>PO<sub>4</sub>, 5% ACN, pH 7.2; 0.3 mL/min. flow rate. B. The molecular weight of Vi polysaccharide was calculated based on pullulan standards.

**A**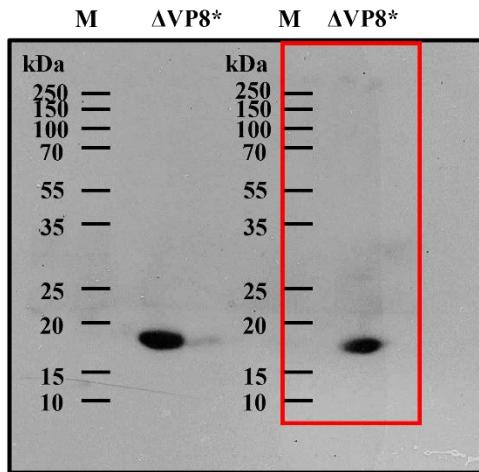**B**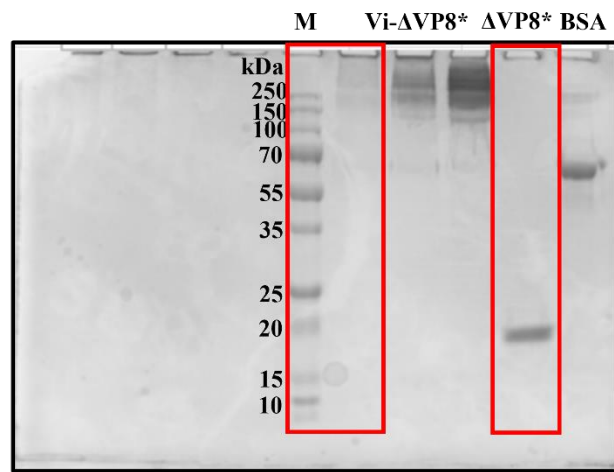

**Supplementary Figure 7.** Original blot and gel referring to main Figure 1A and Figure 3C, respectively. (A) Red box indicates the region selected for presentation in Figure 1A. (B) Red boxes indicate the region selected for presentation in Figure 3C. Full-size Western Blot membrane and gel were imaged with the imaging Densitometer (Model GS-800, Bio-Rad)



**Supplementary Table 1.** Chemical analysis of conjugates prepared by different linkers.

| Conjugate                   | Linker | Recovery (%) <sup>1</sup>   |                      |
|-----------------------------|--------|-----------------------------|----------------------|
|                             |        | Polysaccharide <sup>2</sup> | Protein <sup>3</sup> |
| Vi-EDAC- $\Delta$ VP8*-P[8] | EDAC   | 0                           | 0                    |
| Vi-BMPH- $\Delta$ VP8*-P[8] | BMPH   | 40                          | 5                    |
| Vi-ADH- $\Delta$ VP8*-P[8]  | ADH    | 44                          | 15                   |

<sup>1</sup>Recovery of each conjugate obtained was calculated on the basis of Vi concentration and protein concentration.

<sup>2</sup>Vi concentration was based on Hestrin assay.

<sup>3</sup> $\Delta$ VP8\* protein concentration was based on Bradford assay.
